# Supplementary material for: Prevention of Stress-Induced Depressive-like Behavior by Saffron Extract Is Associated with Modulation of Kynurenine Pathway and Monoamine Neurotransmission
Source: MDPI journal article supplement (doi:10.3390/pharmaceutics13122155), 2021-12-14
Supplement: s1 [file s1]

# Supplementary Materials: Prevention of Stress-Induced Depressive-Like Behavior by Saffron Extract is Associated with Modulation of Kynurenine Pathway and Monoamine Neurotransmission

Camille Monchaux De Oliveira, Véronique De Smedt-Peyrusse, Jennifer Morael, Sylvie Vancassel, Lucile Capuron, David Gaudout, Line Pourtau and Nathalie Castanon

**Table S1.** Classification of the genes of interest and their references according to the systems or pathways they belong to.

| Category                      | Genes                                               | Reference     |
|-------------------------------|-----------------------------------------------------|---------------|
| Housekeeping gene             | <i>Beta-2-Microglobulin (B2M)</i>                   | Mm00437762_m1 |
| HPA axis                      | <i>Glucocorticoid Receptor (GR)</i>                 | Mm00433832_m1 |
| Neurogenesis                  | <i>Brain-Derived Neurotrophic Factor (BDNF)</i>     | Mm01334047_m1 |
| Monoamine receptors           | <i>Dopamine Receptor D1 (DRD1)</i>                  | Mm01353211_m1 |
|                               | <i>Dopamine Receptor D2 (DRD2)</i>                  | Mm00438545_m1 |
|                               | <i>Serotonin 1a Receptor (5-HTR1a)</i>              | Mm00434106_s1 |
|                               | <i>Serotonin 1b Receptor (5-HTR1b)</i>              | Mm00439377_s1 |
| Monoamine degradation enzymes | <i>Monoamine Oxidase A (MAO-A)</i>                  | Mm00558004_m1 |
|                               | <i>Monoamine Oxidase B (MAO-B)</i>                  | Mm00555412_m1 |
|                               | <i>Catechol-O-methyltransferase (COMT)</i>          | Mm00514377_m1 |
| Monoamine transporters        | <i>Dopamine transporter (DAT)</i>                   | Mm00438388_m1 |
|                               | <i>Serotonin transporter (SERT)</i>                 | Mm00439391_m1 |
| Kynurenine pathway            | <i>Indoleamine 2,3-Dioxygenase (IDO)</i>            | Mm00492590_m1 |
|                               | <i>Kynurenine 3-Monooxygenase (KMO)</i>             | Mm00505511_m1 |
|                               | <i>Kynureninase (KYNU)</i>                          | Mm00551012_m1 |
|                               | <i>3-Hydroxyanthranilate 3,4-Dioxygenase (HAAO)</i> | Mm00517945_m1 |
|                               | <i>Kynurenine Aminotransferase (KAT)</i>            | Mm01351821_m1 |
| BH4 pathway                   | <i>GTP-Cyclohydrolase I (GTPCH1)</i>                | Mm01322973_m1 |
|                               | <i>6-Pyruvoyl Tetrahydropterin (PTS)</i>            | Mm00478494_m1 |
|                               | <i>Sepiapterin Reductase (SPR)</i>                  | Mm00488430_m1 |

**Table S2.** Parameters used for each WB (sample concentration, saturation conditions, dilution of Ir antibody and reference of the appropriate Ir antibody).

|     | Protein Name | Sample Concentration | Saturation | Ir Antibody Concentration | Ir Antibody                    |
|-----|--------------|----------------------|------------|---------------------------|--------------------------------|
| FCx | DRD1         | 10 µg                | Milk 5%    | 1/1000                    | α Rat (712-035-150/Jackson)    |
|     | DRD2         | 10 µg                | Milk 5%    | 1/1000                    | α Rabbit (711-035-152/Jackson) |
|     | DAT          | 10 µg                | Milk 5%    | 1/2000                    | α Rabbit (711-035-152/Jackson) |
|     | 5-HTR1a      | 5 µg                 | Milk 5%    | 1/1000                    | α Rabbit (711-035-152/Jackson) |

|     |         |       |         |                  |                                |
|-----|---------|-------|---------|------------------|--------------------------------|
|     | SERT    | 10 µg | BSA 5%  | 1/1000           | α Rabbit (711-035-152/Jackson) |
| STR | DRD1    | 5 µg  | Milk 5% | 1/1000           | α Rat (712-035-150/Jackson)    |
|     | DRD2    | 5 µg  | Milk 5% | 1/1000           | α Rabbit (711-035-152/Jackson) |
|     | DAT     | 5 µg  | Milk 5% | 1/2000           | α Rabbit (711-035-152/Jackson) |
|     | 5-HTR1a | 5 µg  | Milk 5% | 1/1000           | α Rabbit (711-035-152/Jackson) |
| HPC | SERT    | 10 µg | BSA 5%  | 1/1000           | α Rabbit (711-035-152/Jackson) |
|     | GAPDH   | -     | Milk 5% | 1/20000 or 25000 | α Rabbit (711-035-152/Jackson) |
